# Supplementary material for: Tacrine–deferiprone hybrids as multi-target-directed metal chelators against Alzheimer's disease: a two-in-one drug
Source: Royal Society of Chemistry journal article supplement (doi:10.1039/c8mt00143j), 2018-08-22
Supplement: c8mt00143j1.pdf [file c8mt00143j1.pdf]

## Supplementary Information

### Tacrine-deferiprone hybrids as multi-target-directed metal chelators against Alzheimer's disease: two in one drug

Karam Chand<sup>‡,a</sup>, Rajeshwari<sup>‡,a</sup>, Emanuel Candeias<sup>b</sup>, Sandra M Cardoso<sup>b,c</sup>, Sílvia Chaves<sup>a</sup>, M. Amélia Santos<sup>a\*</sup>

<sup>a</sup>*Centro de Química Estrutural, Instituto Superior Técnico, Universidade de Lisboa, Av. Rovisco Pais 1, 1049-001 Lisboa, Portugal*

<sup>b</sup>*CNC–Center for Neuroscience and Cell Biology, University of Coimbra, Coimbra, Portugal.* <sup>c</sup>*Institute of Molecular and Cell Biology, Faculty of Medicine, University of Coimbra, Coimbra, Portugal*

<sup>‡</sup> Authors contributed equally

□ Corresponding author: M.A. Santos, E-mail address: masantos@ist.utl.pt

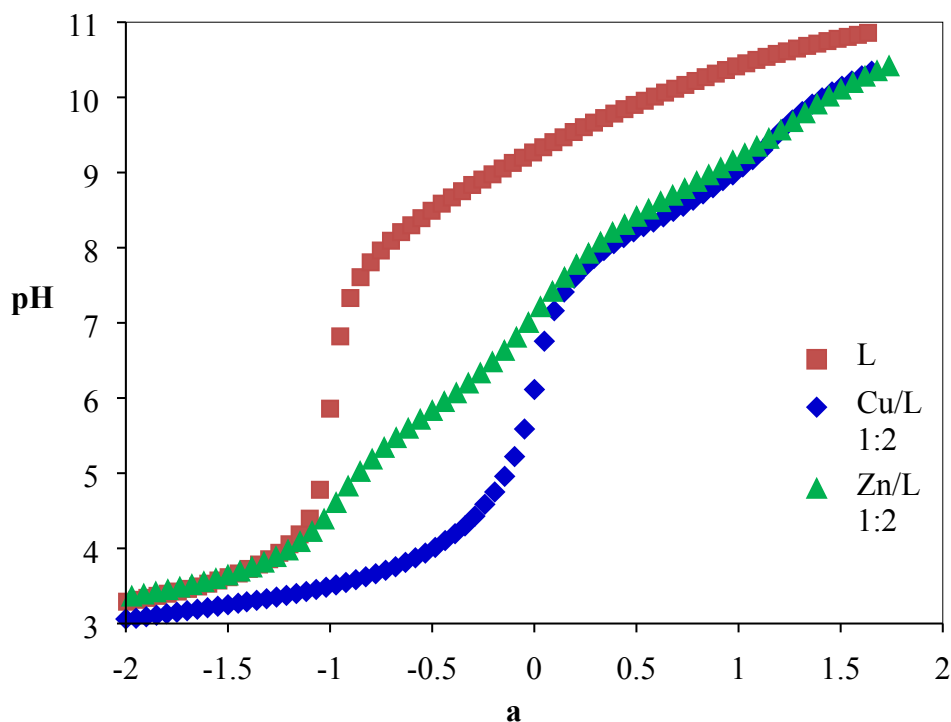

**Fig. S1.** Potentiometric titration curves of **32** (20% w/w DMSO/H<sub>2</sub>O, *I* = 0.1 M KCl, *T* = 25.0 ± 0.1 °C, *C<sub>L</sub>* = 2 × 10<sup>-4</sup> M); *a* represents moles of base per mole of ligand

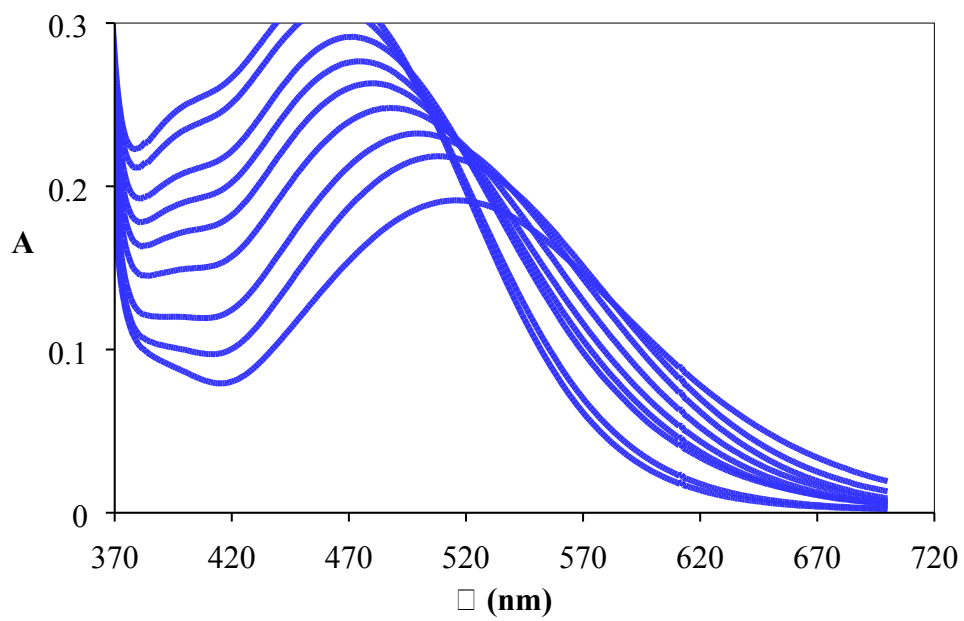

**Fig. S2** Electronic spectra for the 1:3 Fe(III)/**32** system (pH 2.42-7.43,  $C_L = 2.0 \times 10^{-4}$  M).

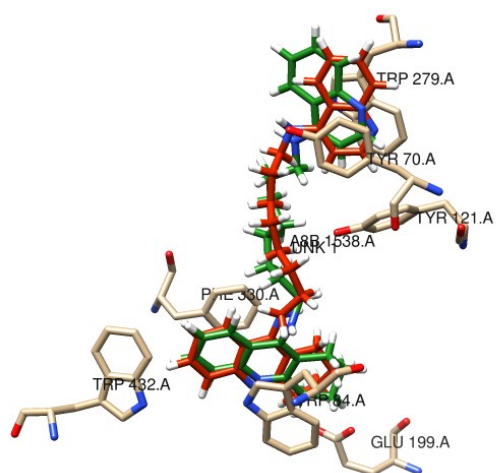

**Fig. S3:** Redocking results of the original ligand (red) and its superimposition with the original X-ray structure (green) of the corresponding reported complex with AChE (PDB entry 1ODC) (RMSD = 5.2 Å).

### List of NMR spectra (Sp1-Sp16)

1.  $^1\text{H}$  &  $^{13}\text{C}$  NMR of 2-(3-(Benzyloxy)-2-methyl-4-oxopyridin-1(4H)-yl)-N-(2-((1,2,3,4-tetrahydroacridin-9-yl)amino)ethyl)acetamide (**18**). Sp1
2.  $^1\text{H}$  &  $^{13}\text{C}$  NMR of 2-(3-(Benzyloxy)-2-methyl-4-oxopyridin-1(4H)-yl)-N-(3-((1,2,3,4-tetrahydroacridin-9-yl)amino)propyl)acetamide (**19**). Sp2
3.  $^1\text{H}$  &  $^{13}\text{C}$  NMR of 2-(3-(Benzyloxy)-2-methyl-4-oxopyridin-1(4H)-yl)-N-(4-((1,2,3,4-tetrahydroacridin-9-yl)amino)butyl)acetamide (**20**). Sp3
4.  $^1\text{H}$  &  $^{13}\text{C}$  NMR of 2-(3-(Benzyloxy)-2-methyl-4-oxopyridin-1(4H)-yl)-N-(2-((6-chloro-1,2,3,4-tetrahydroacridin-9-yl)amino)ethyl)acetamide (**21**). Sp4
5.  $^1\text{H}$  &  $^{13}\text{C}$  NMR of 2-(3-(benzyloxy)-2-methyl-4-oxopyridin-1(4H)-yl)-N-(3-((6-chloro-1,2,3,4-tetrahydroacridin-9-yl)amino)propyl)acetamide (**22**). Sp5
6.  $^1\text{H}$  &  $^{13}\text{C}$  NMR of 2-(3-(Benzyloxy)-2-methyl-4-oxopyridin-1(4H)-yl)-N-(4-((6-chloro-1,2,3,4-tetrahydroacridin-9-yl)amino)butyl)acetamide (**23**). Sp6
7.  $^1\text{H}$  &  $^{13}\text{C}$  NMR of 2-(3-(Benzyloxy)-2-methyl-4-oxopyridin-1(4H)-yl)-N-(2-hydroxy-3-((1,2,3,4-tetrahydroacridin-9-yl)amino)propyl)acetamide (**24**). Sp7
8.  $^1\text{H}$  &  $^{13}\text{C}$  NMR of 2-(3-(Benzyloxy)-2-methyl-4-oxopyridin-1(4H)-yl)-N-(3-((6-chloro-1,2,3,4-tetrahydroacridin-9-yl)amino)-2-hydroxypropyl)acetamide (**25**). Sp8
9.  $^1\text{H}$  &  $^{13}\text{C}$  NMR of 2-(3-hydroxy-2-methyl-4-oxopyridin-1(4H)-yl)-N-(2-((1,2,3,4-tetrahydroacridin-9-yl)amino)ethyl)acetamide (**26**). Sp9
10.  $^1\text{H}$  &  $^{13}\text{C}$  NMR of 2-(3-Hydroxy-2-methyl-4-oxopyridin-1(4H)-yl)-N-(3-((1,2,3,4-tetrahydroacridin-9-yl)amino)propyl)acetamide (**27**). Sp10
11.  $^1\text{H}$  &  $^{13}\text{C}$  NMR of 2-(3-hydroxy-2-methyl-4-oxopyridin-1(4H)-yl)-N-(4-((1,2,3,4-tetrahydroacridin-9-yl)amino)butyl)acetamide (**28**). Sp11
12.  $^1\text{H}$  &  $^{13}\text{C}$  NMR of N-(2-((6-chloro-1,2,3,4-tetrahydroacridin-9-yl)amino)ethyl)-2-(3-hydroxy-2-methyl-4-oxopyridin-1(4H)-yl)acetamide (**29**). Sp12
13.  $^1\text{H}$  &  $^{13}\text{C}$  NMR of N-(3-((6-Chloro-1,2,3,4-tetrahydroacridin-9-yl)amino)propyl)-2-(3-hydroxy-2-methyl-4-oxopyridin-1(4H)-yl)acetamide (**30**). Sp13
14.  $^1\text{H}$  &  $^{13}\text{C}$  NMR of N-(4-((6-chloro-1,2,3,4-tetrahydroacridin-9-yl)amino)butyl)-2-(3-hydroxy-2-methyl-4-oxopyridin-1(4H)-yl)acetamide (**31**). Sp14
15.  $^1\text{H}$  &  $^{13}\text{C}$  NMR of 2-(3-hydroxy-2-methyl-4-oxopyridin-1(4H)-yl)-N-(2-hydroxy-3-((1,2,3,4-tetrahydroacridin-9-yl)amino)propyl)acetamide (**32**). Sp15

16.  $^1\text{H}$  &  $^{13}\text{C}$  NMR of *N*-(3-((6-chloro-1,2,3,4-tetrahydroacridin-9-yl)amino)-2-hydroxypropyl)-2-(3-hydroxy-2-methyl-4-oxopyridin-1(4*H*)-yl)acetamide (**33**).

Sp16

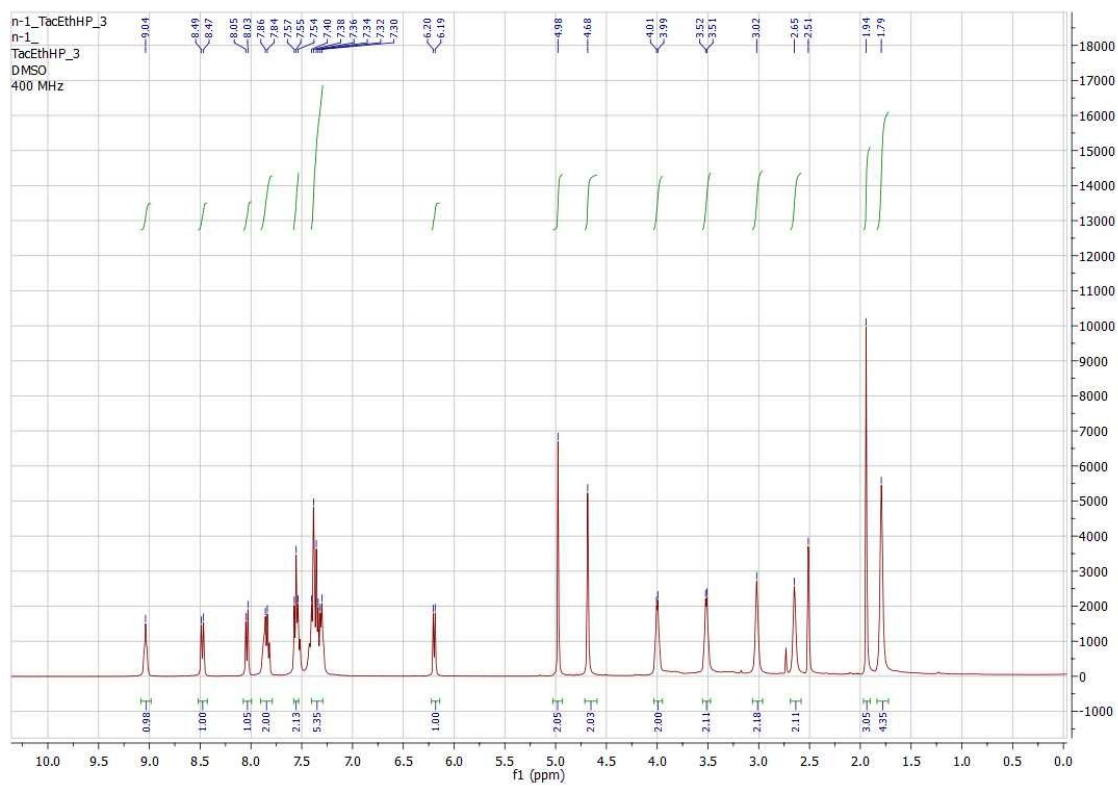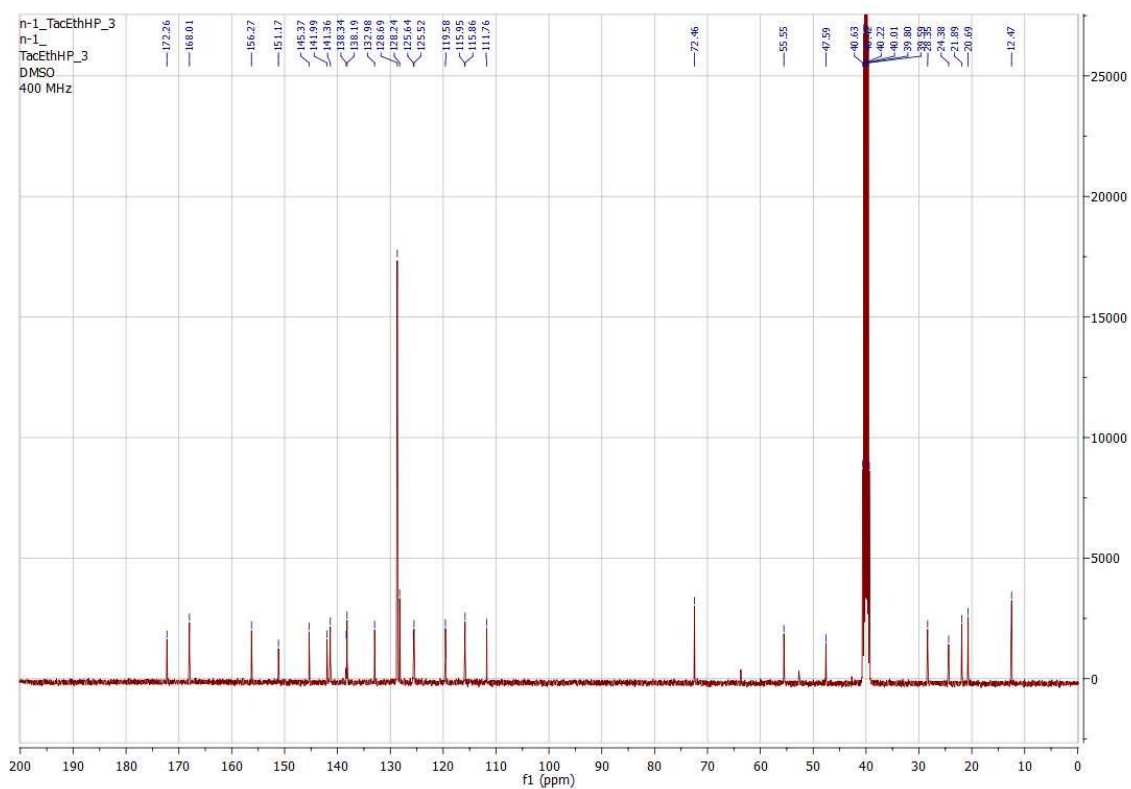

Sp1 -  $^1\text{H}$  &  $^{13}\text{C}$  NMR of 2-(3-(Benzyloxy)-2-methyl-4-oxopyridin-1(4H)-yl)-N-(2-((1,2,3,4-tetrahydroacridin-9-yl)amino)ethyl)acetamide (**18**).

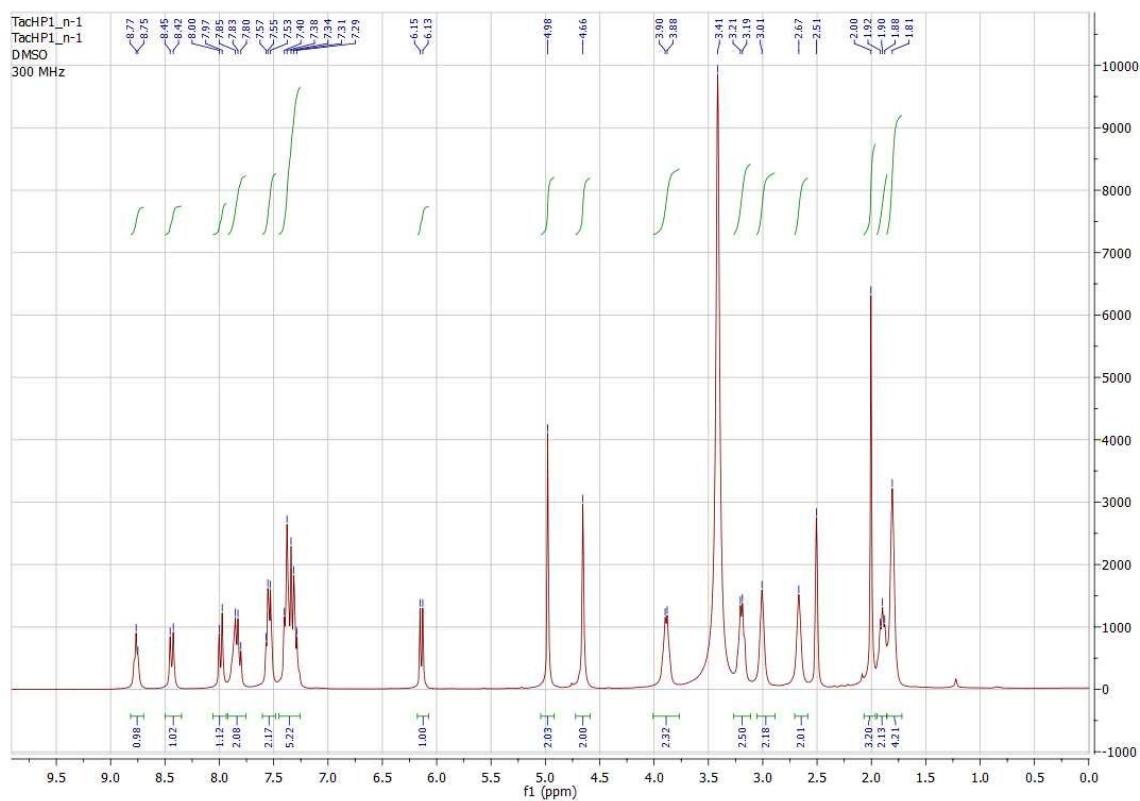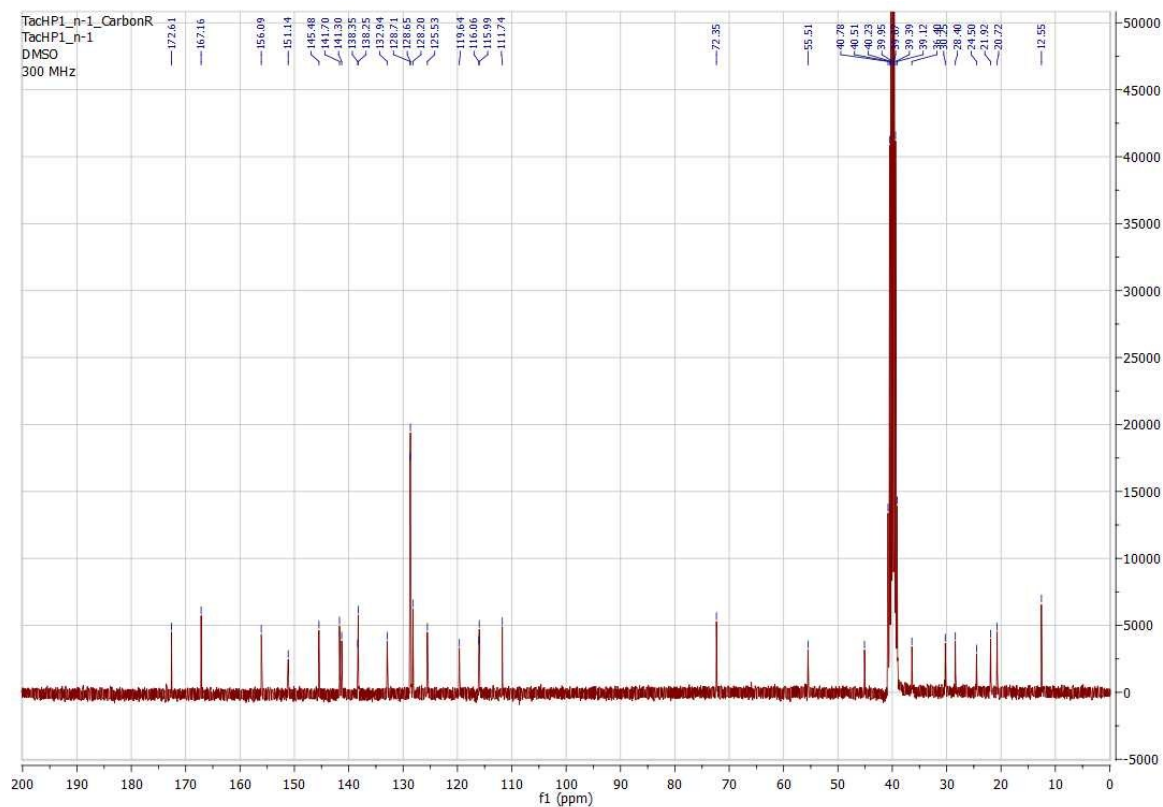



Sp3 -  $^1\text{H}$  &  $^{13}\text{C}$  NMR of 2-(3-(Benzyloxy)-2-methyl-4-oxopyridin-1(4H)-yl)-N-(4-((1,2,3,4-tetrahydroacridin-9-yl)amino)butyl)acetamide (**20**).

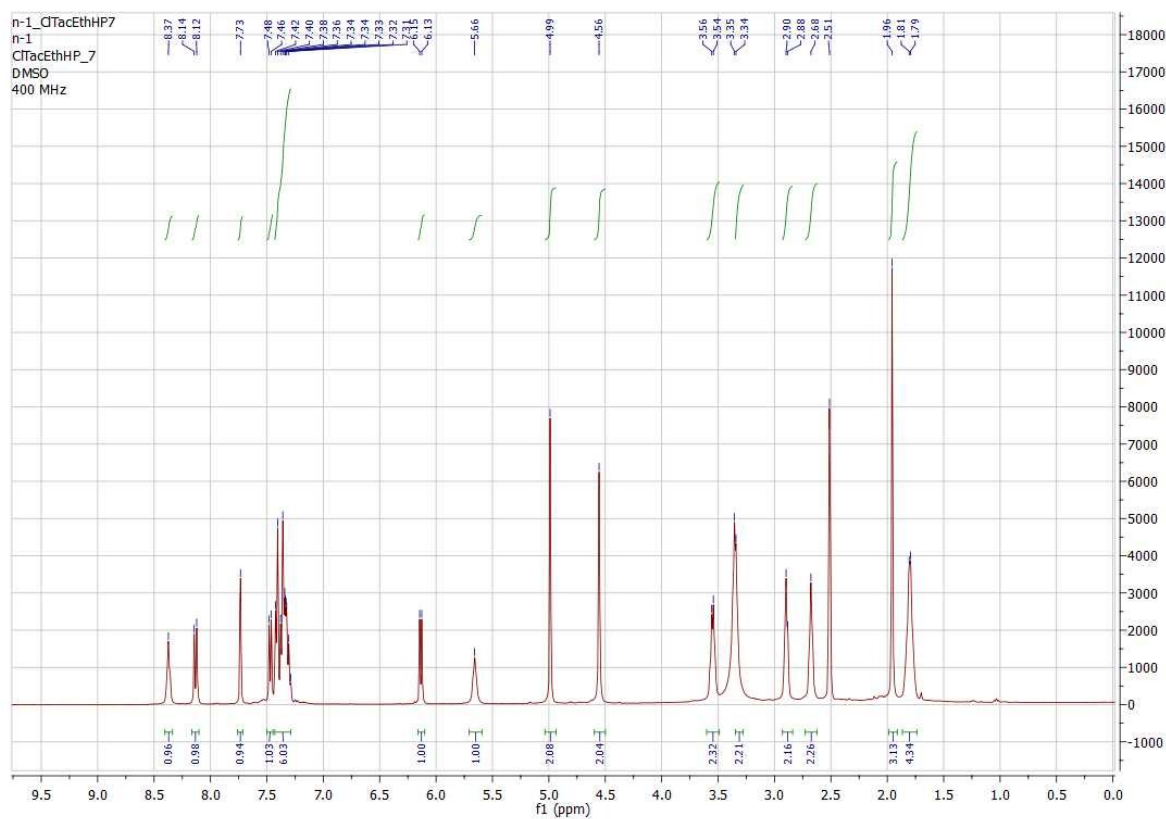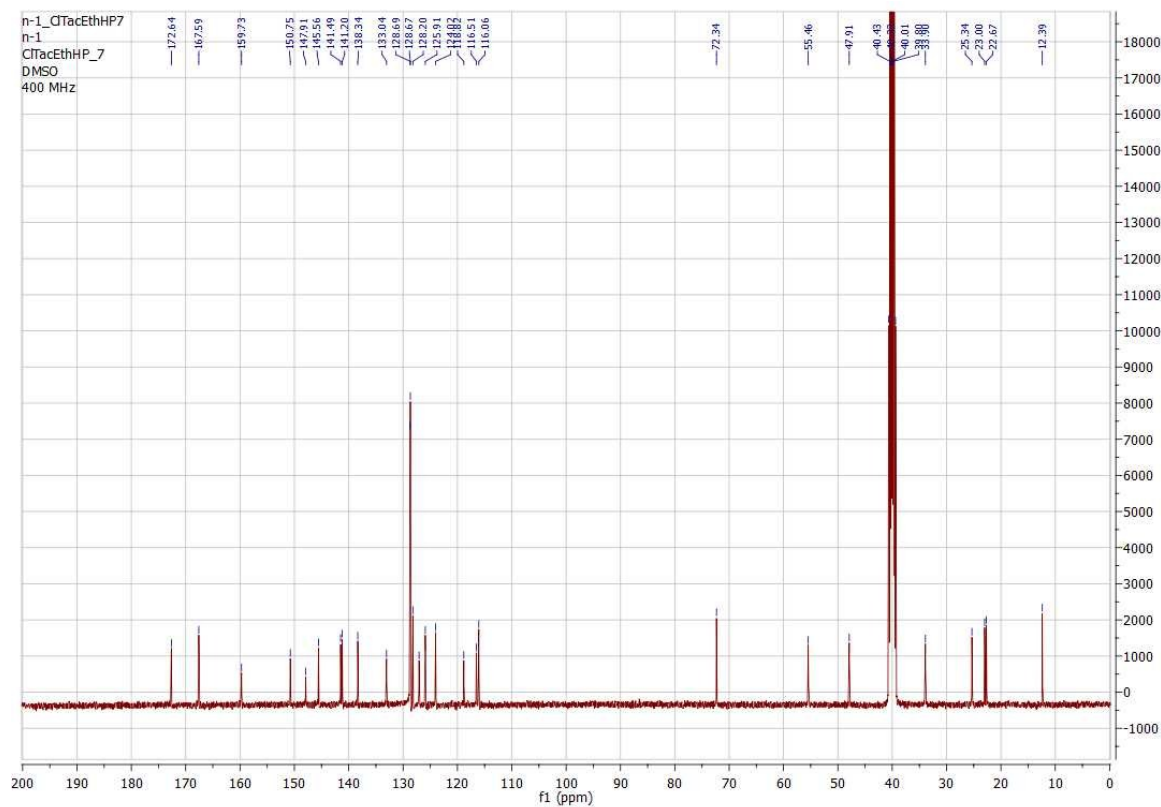



Sp4 -  $^1\text{H}$  &  $^{13}\text{C}$  NMR of 2-(3-(Benzyloxy)-2-methyl-4-oxopyridin-1(4H)-yl)-N-((6-chloro-1,2,3,4-tetrahydroacridin-9-yl)amino)ethyl)acetamide (**21**).

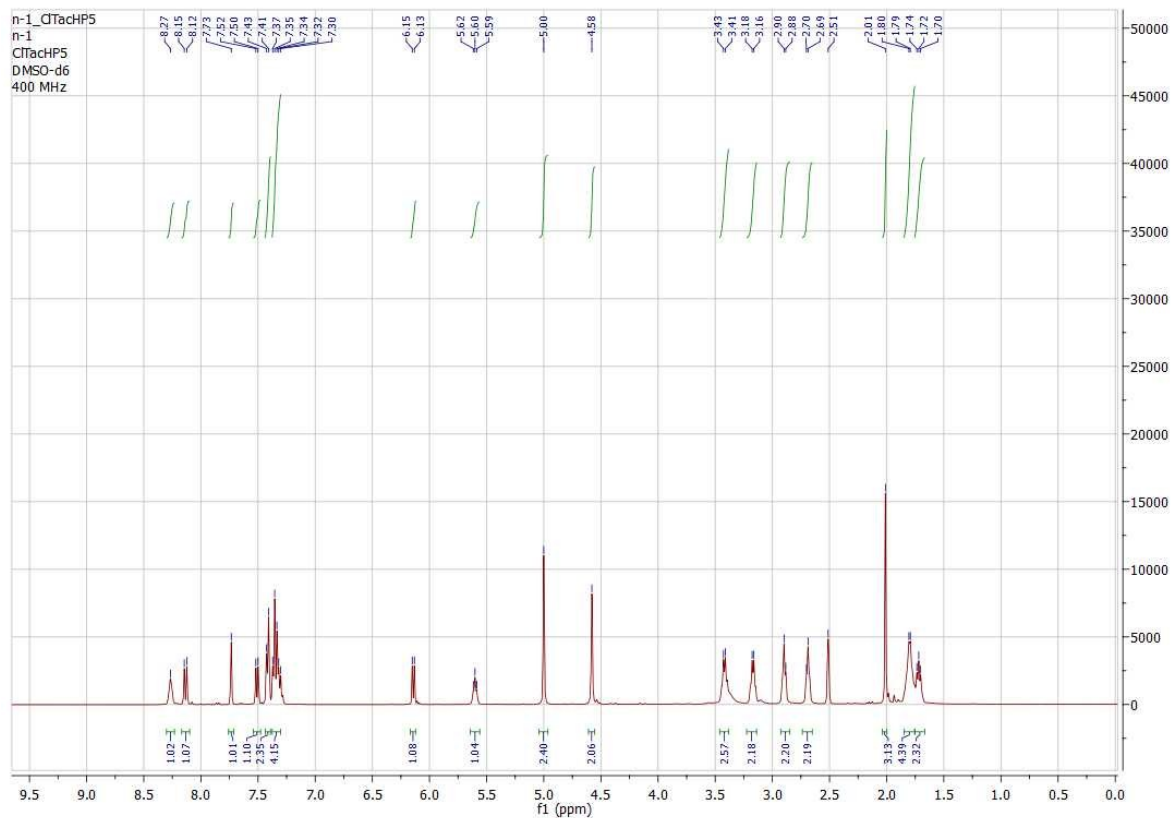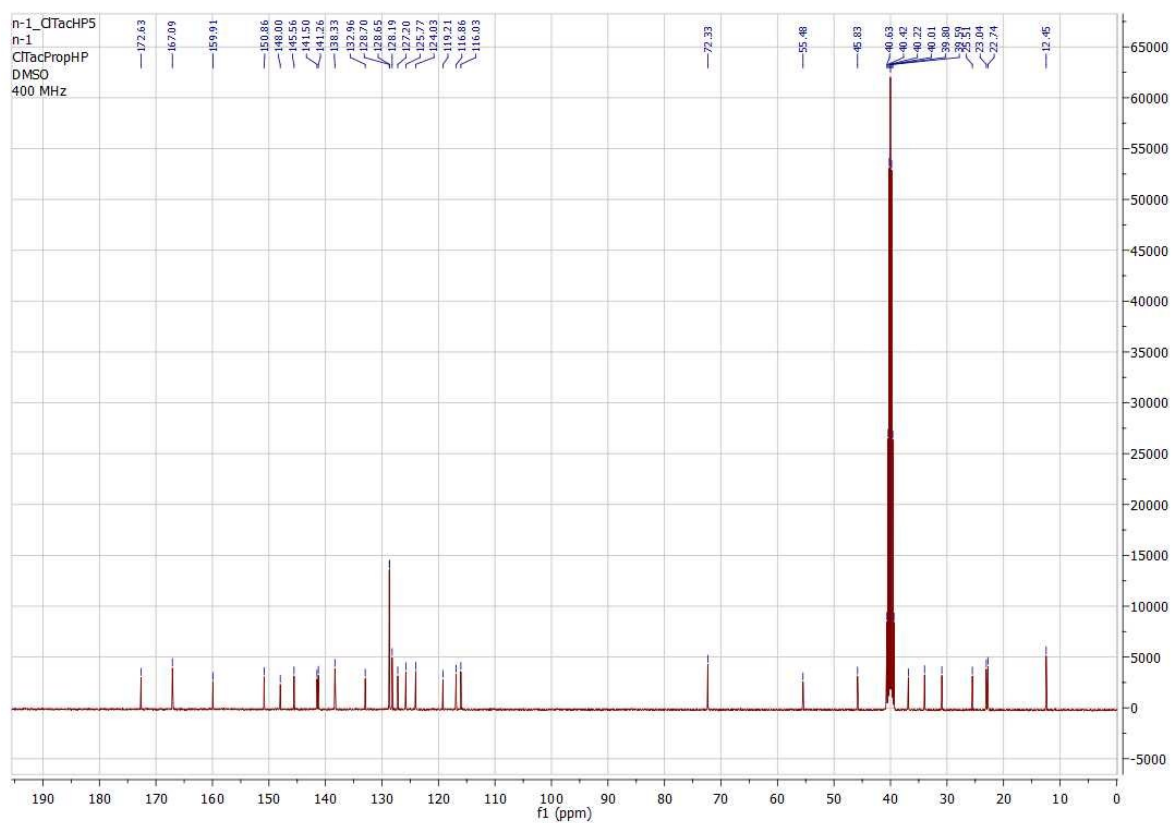

Sp5 -  $^1\text{H}$  &  $^{13}\text{C}$  NMR of 2-(3-(benzyloxy)-2-methyl-4-oxopyridin-1(4H)-yl)-N-(3-((6-chloro-1,2,3,4-tetrahydroacridin-9-yl)amino)propyl)acetamide (**22**).

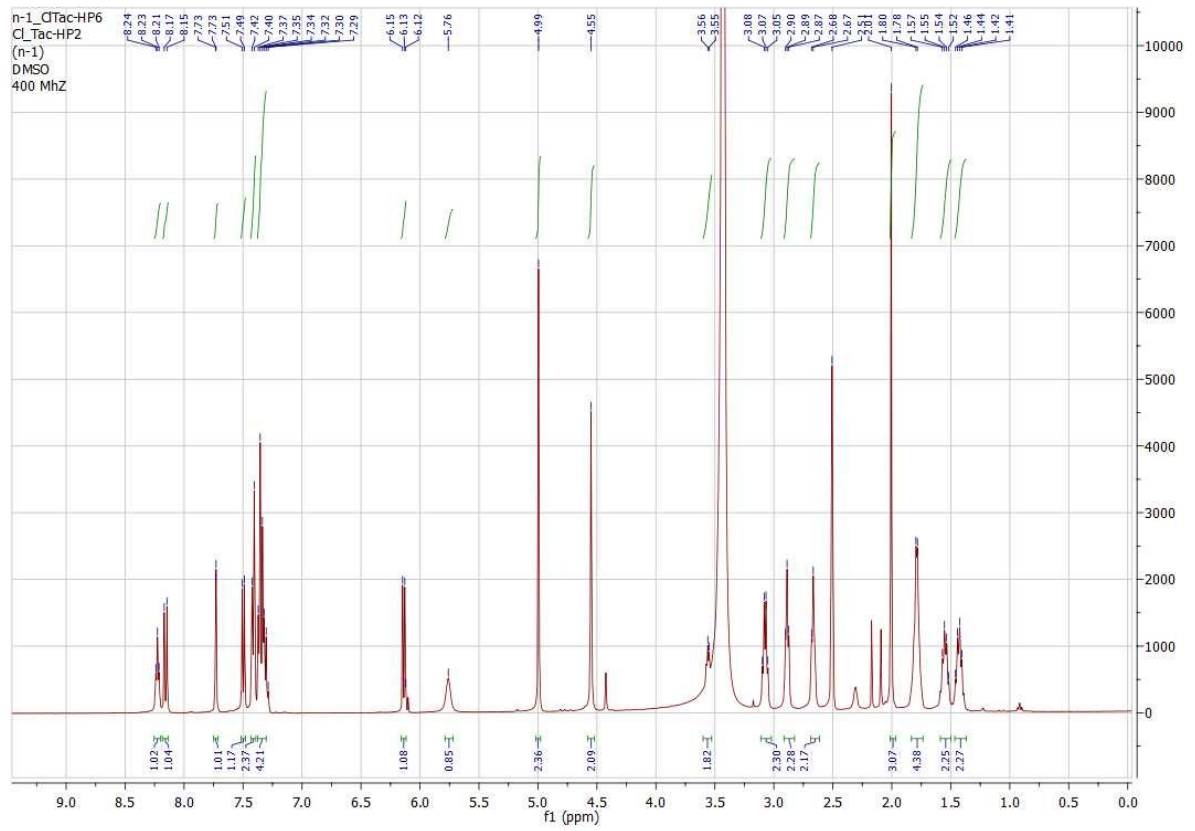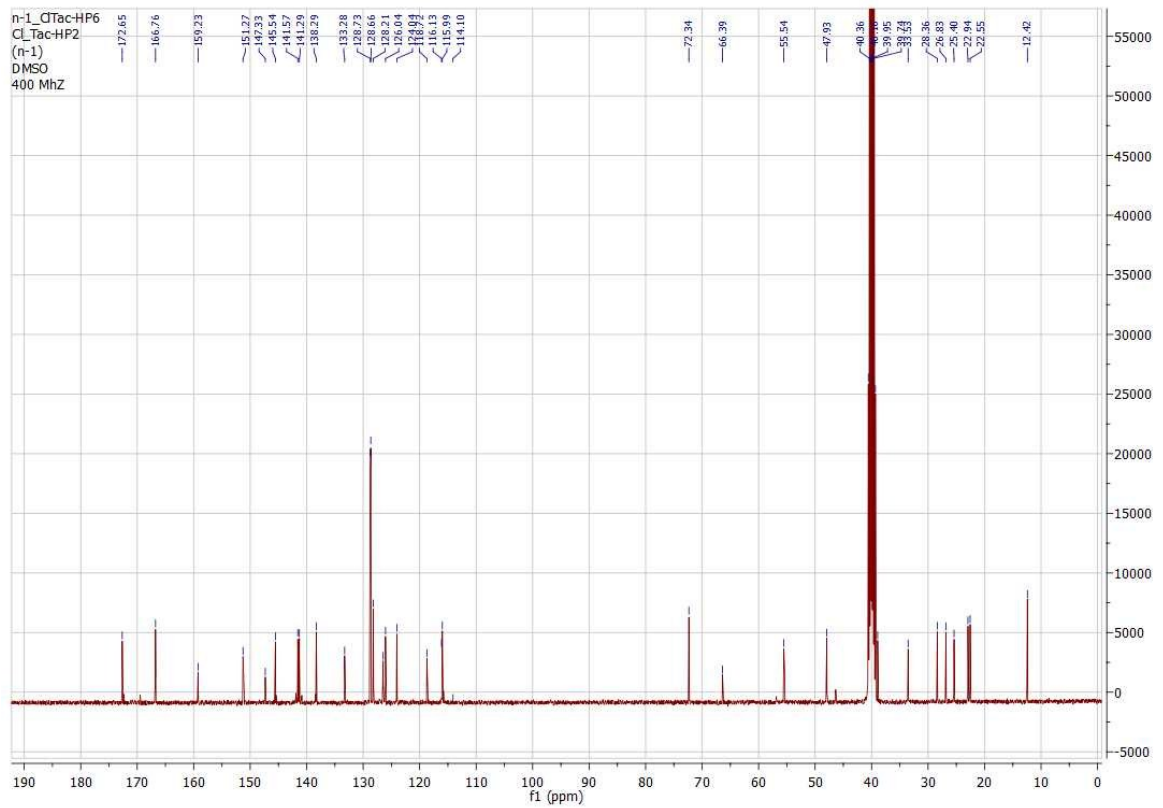

Sp6 -  $^1\text{H}$  &  $^{13}\text{C}$  NMR of 2-(3-(Benzyloxy)-2-methyl-4-oxopyridin-1(4H)-yl)-N-(4-((6-chloro-1,2,3,4-tetrahydroacridin-9-yl)amino)butyl)acetamide (**23**).

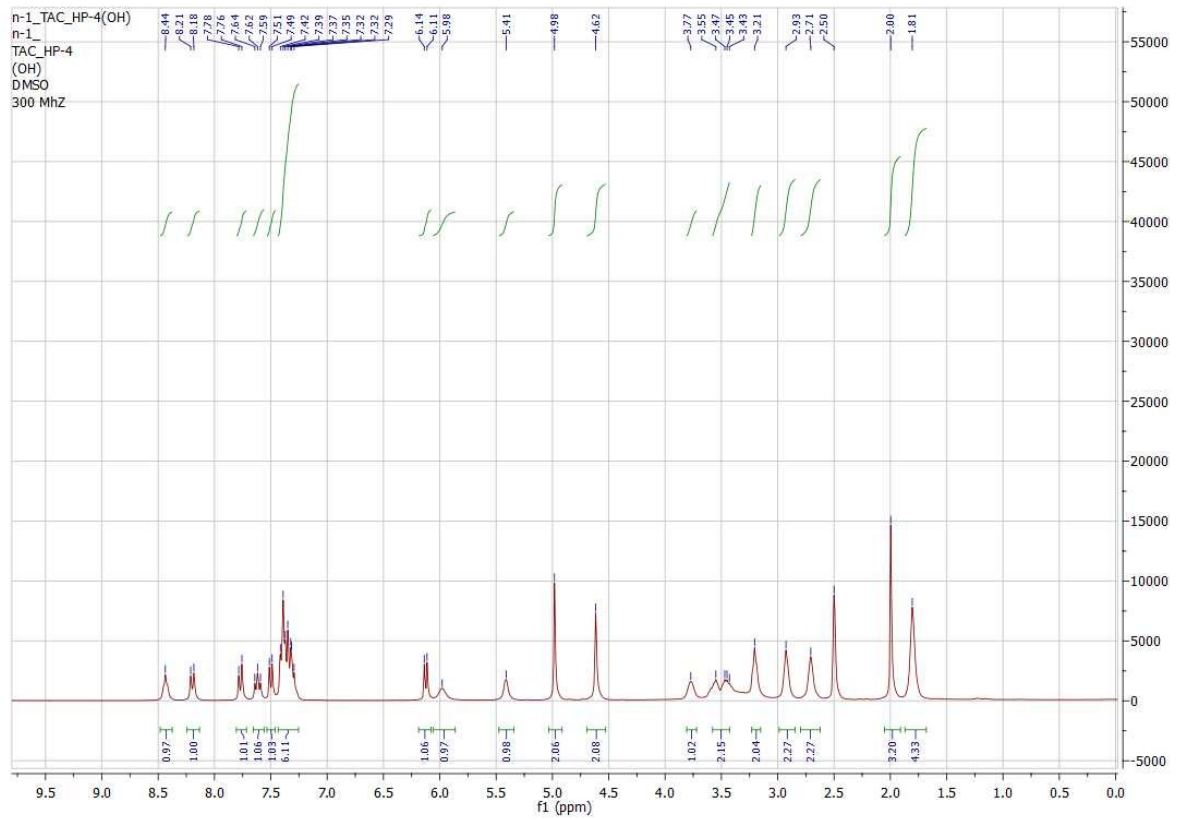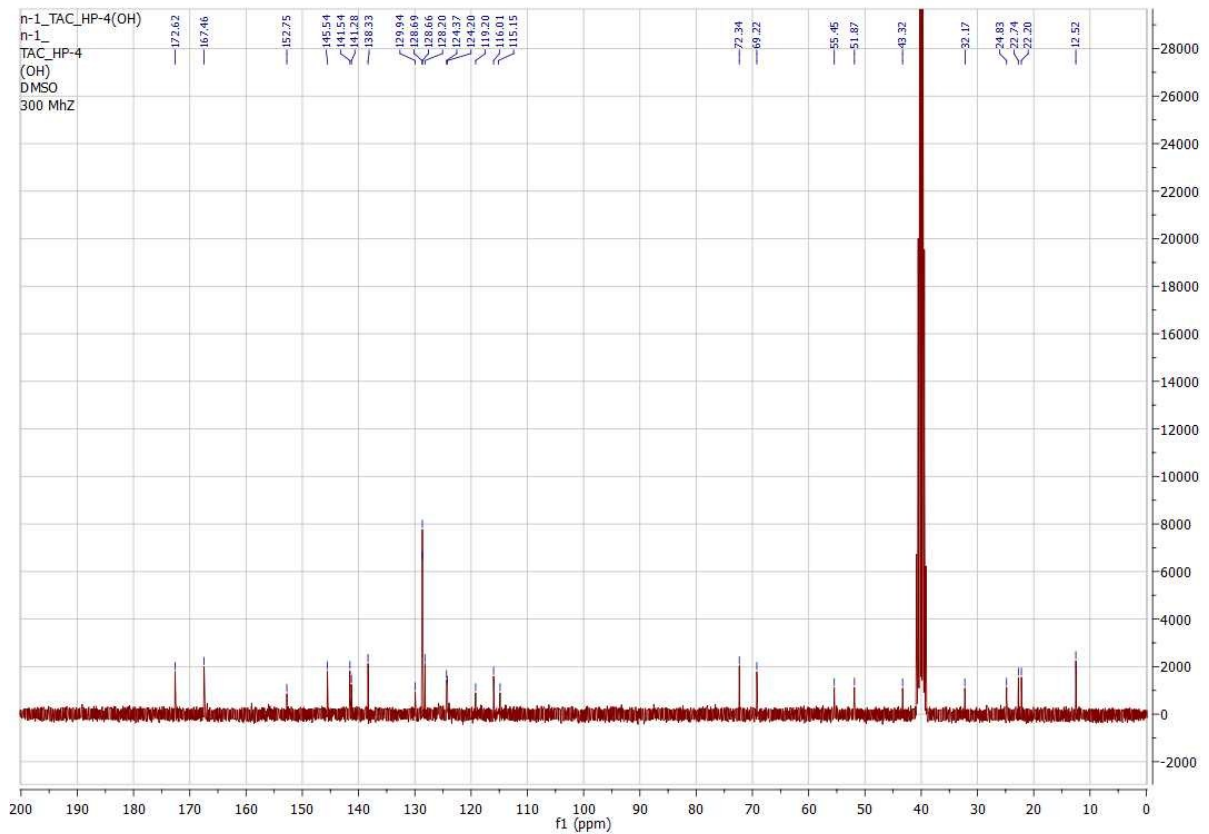

Sp7 -  $^1\text{H}$  &  $^{13}\text{C}$  NMR of 2-(3-(Benzyloxy)-2-methyl-4-oxopyridin-1(4H)-yl)-N-(2-hydroxy-3-((1,2,3,4-tetrahydroacridin-9-yl)amino)propyl)acetamide (**24**).

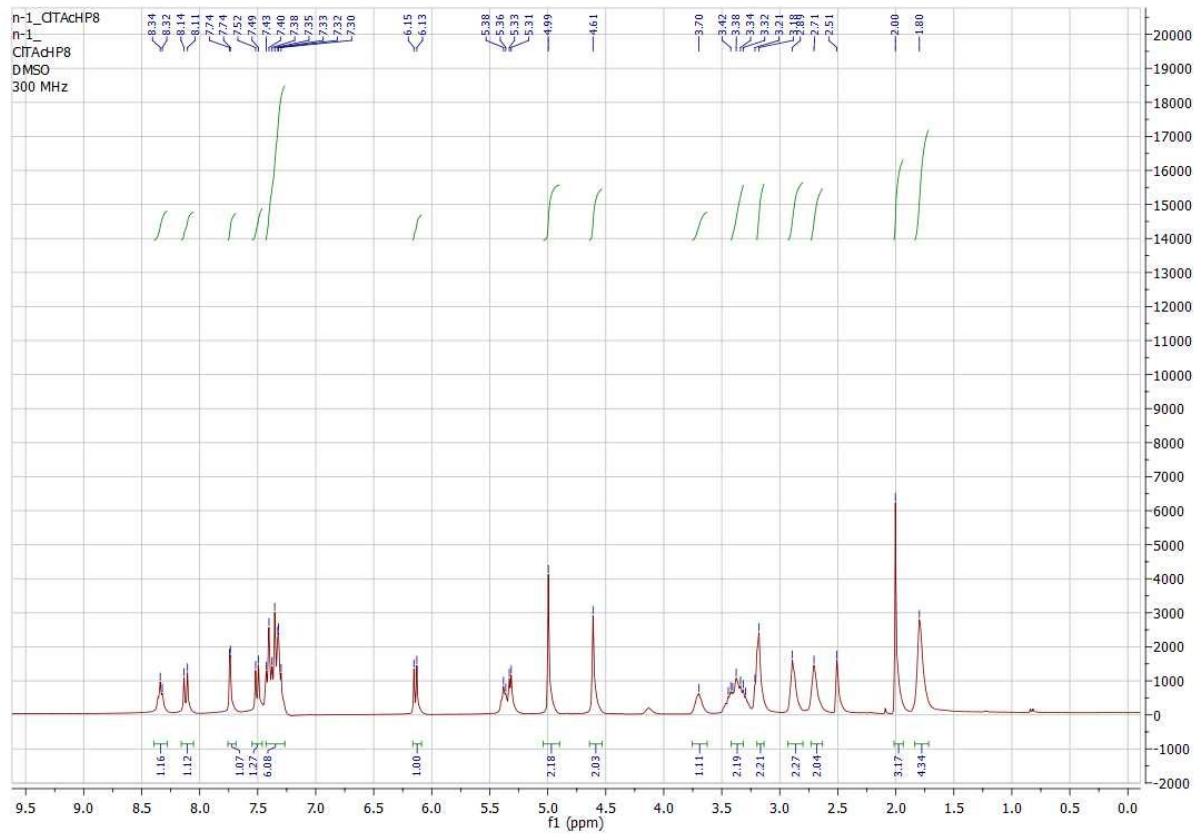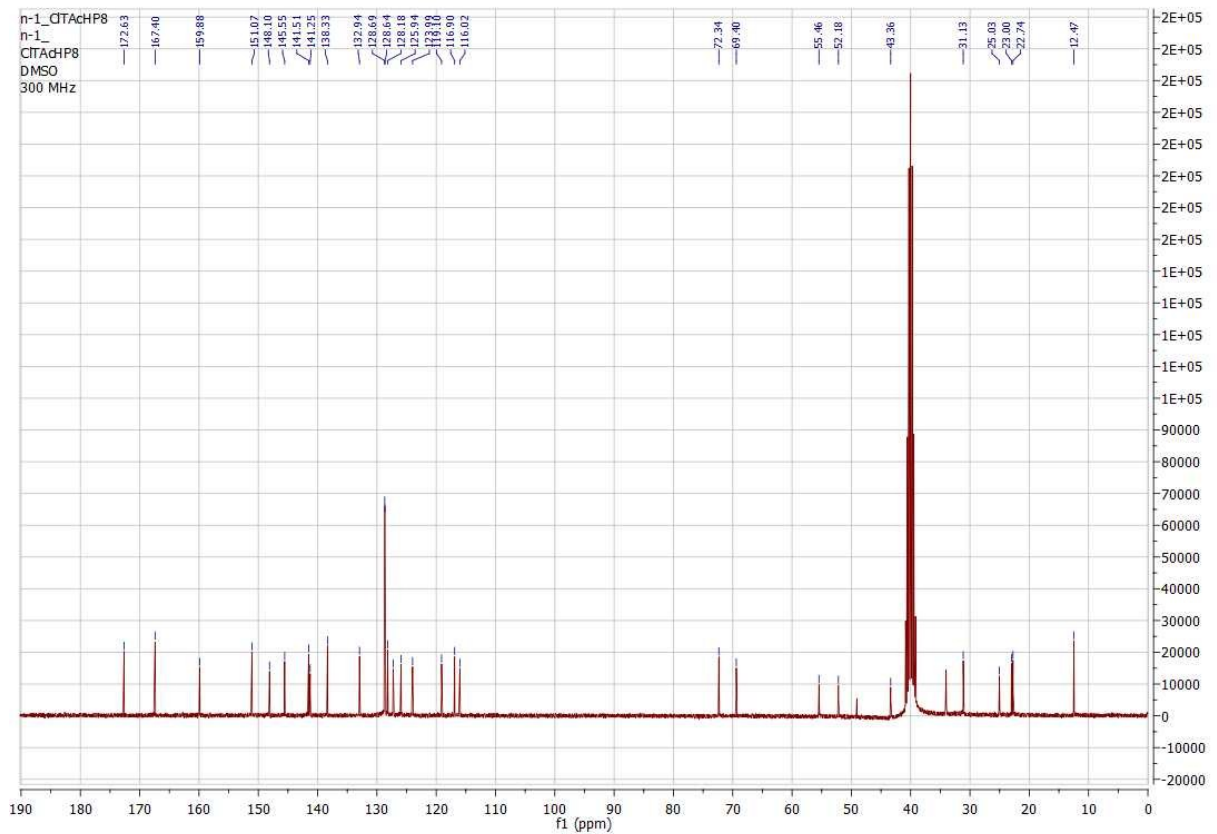

Sp8 -  $^1\text{H}$  &  $^{13}\text{C}$  NMR of 2-(3-(Benzyloxy)-2-methyl-4-oxopyridin-1(4*H*)-yl)-*N*-(3-((6-chloro-1,2,3,4-tetrahydroacridin-9-yl)amino)-2-hydroxypropyl) acetamide (**25**).

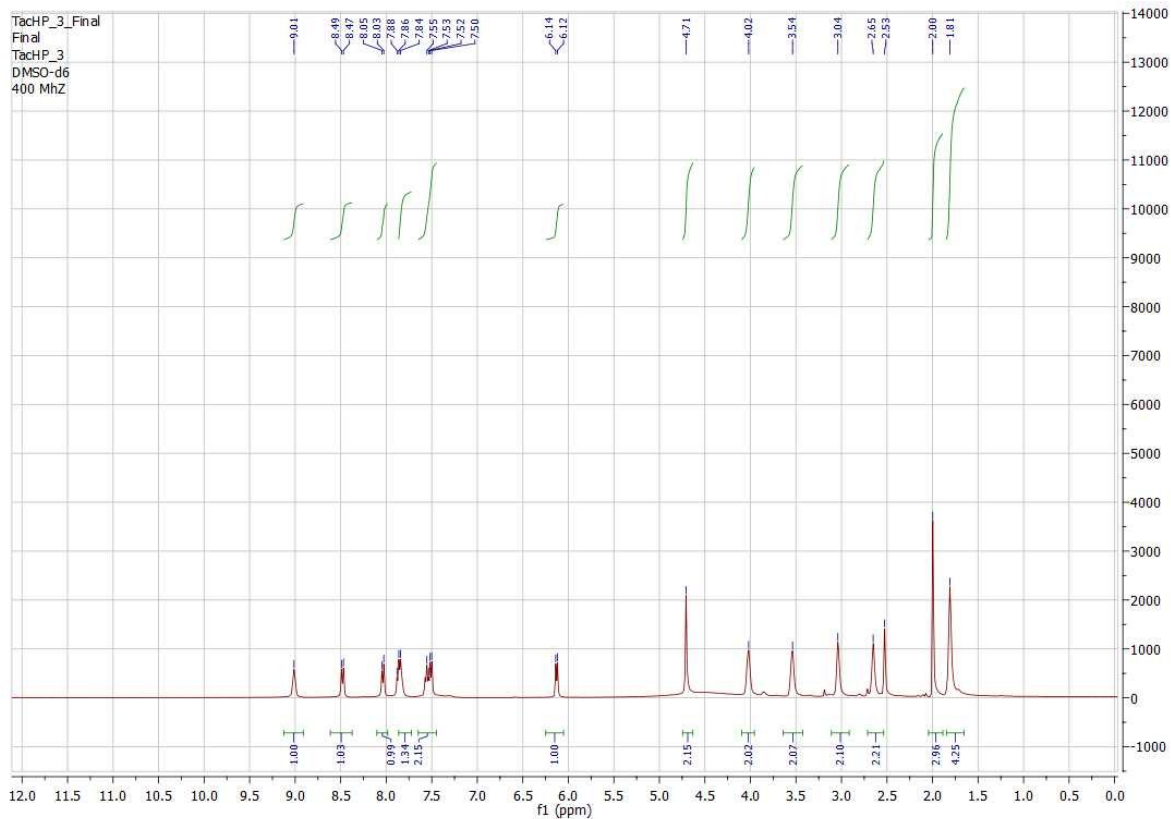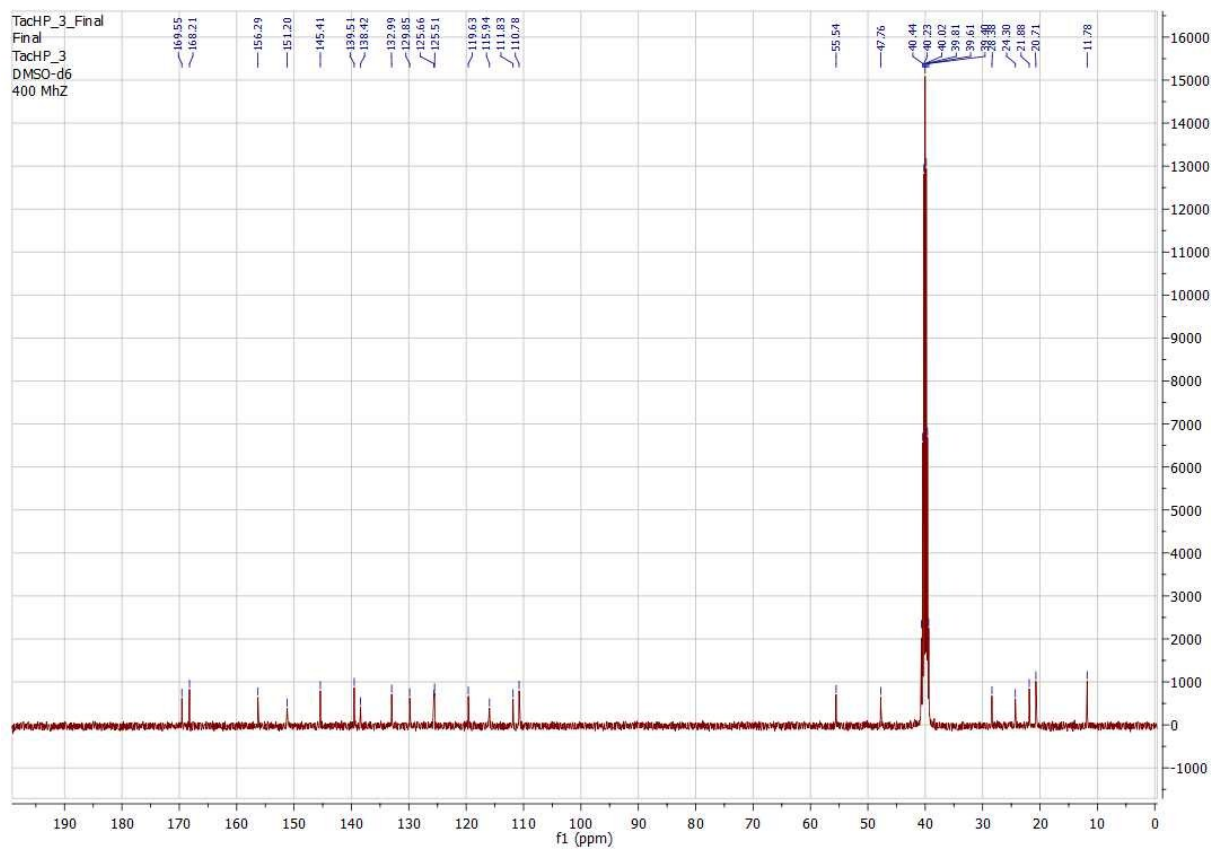

Sp9 -  $^1\text{H}$  &  $^{13}\text{C}$  NMR of 2-(3-hydroxy-2-methyl-4-oxopyridin-1(4*H*)-yl)-*N*-(2-((1,2,3,4-tetrahydroacridin-9-yl)amino)ethyl)acetamide (**26**).

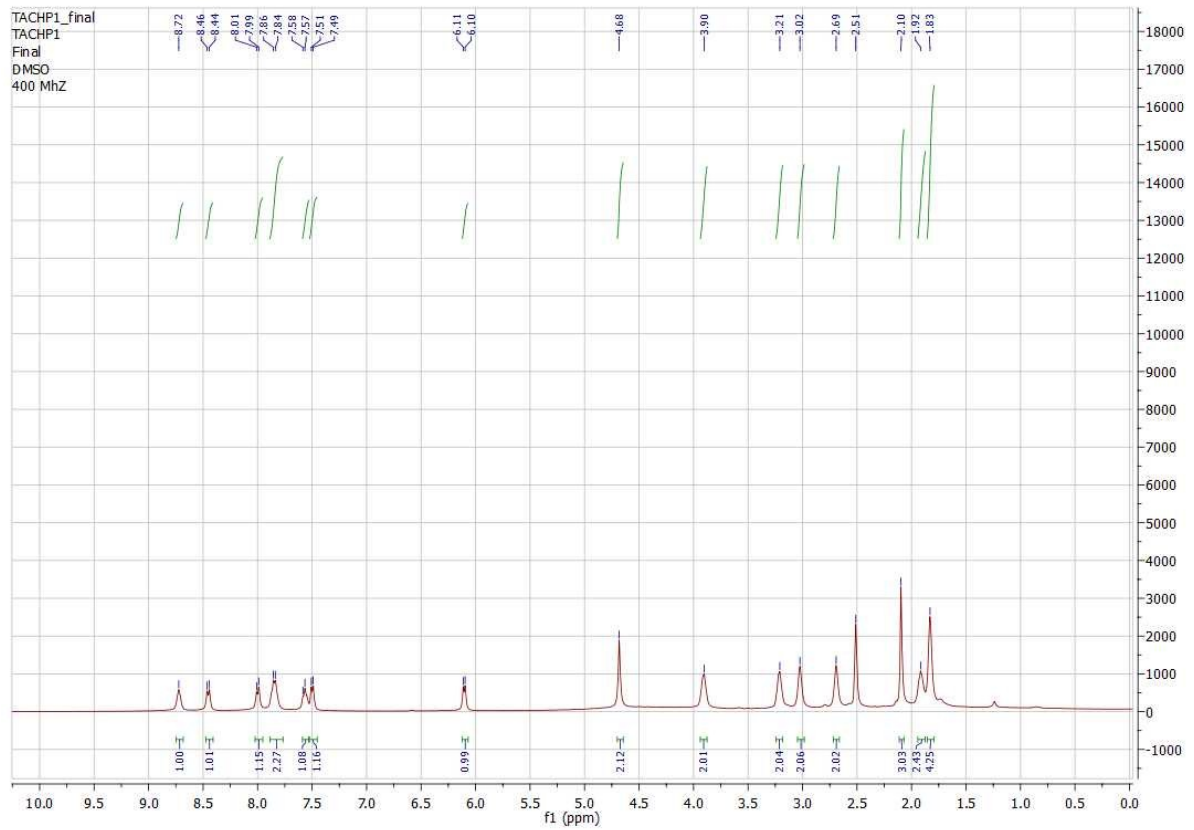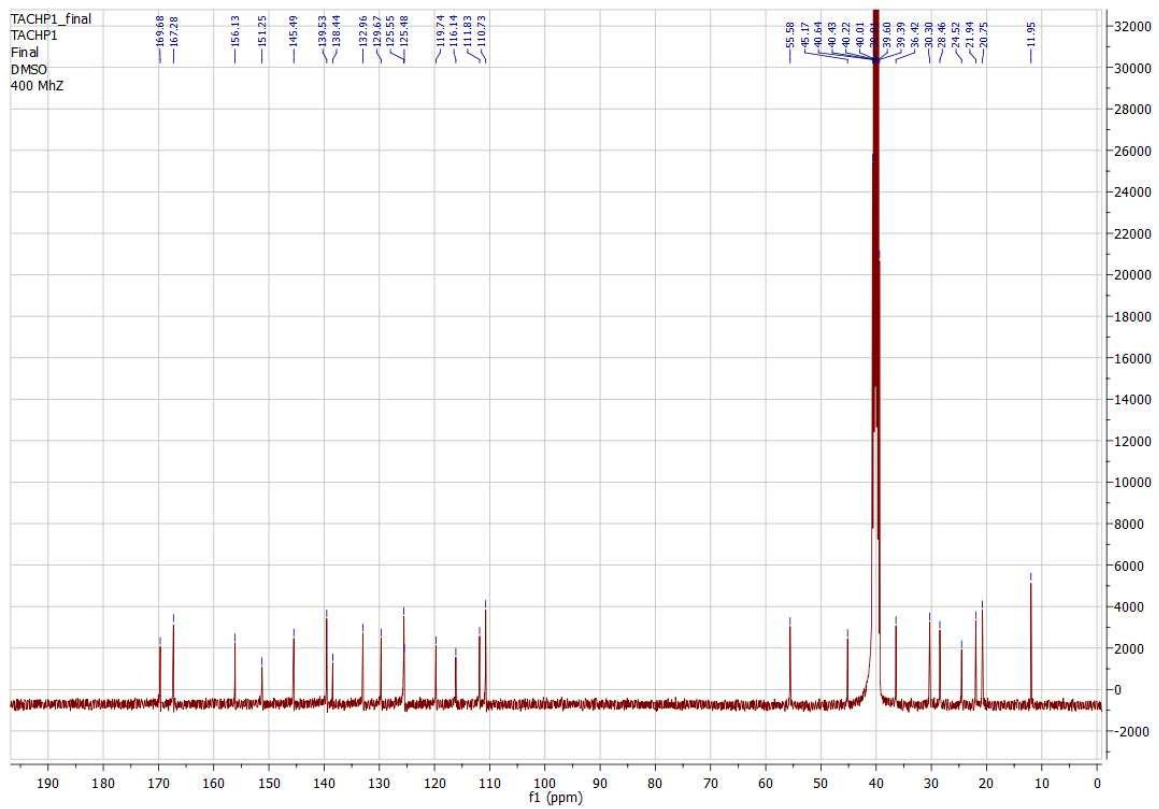

Sp10 -  $^1\text{H}$  &  $^{13}\text{C}$  NMR of 2-(3-Hydroxy-2-methyl-4-oxopyridin-1(4H)-yl)-N-(3-((1,2,3,4-tetrahydroacridin-9-yl)amino)propyl)acetamide (**27**).

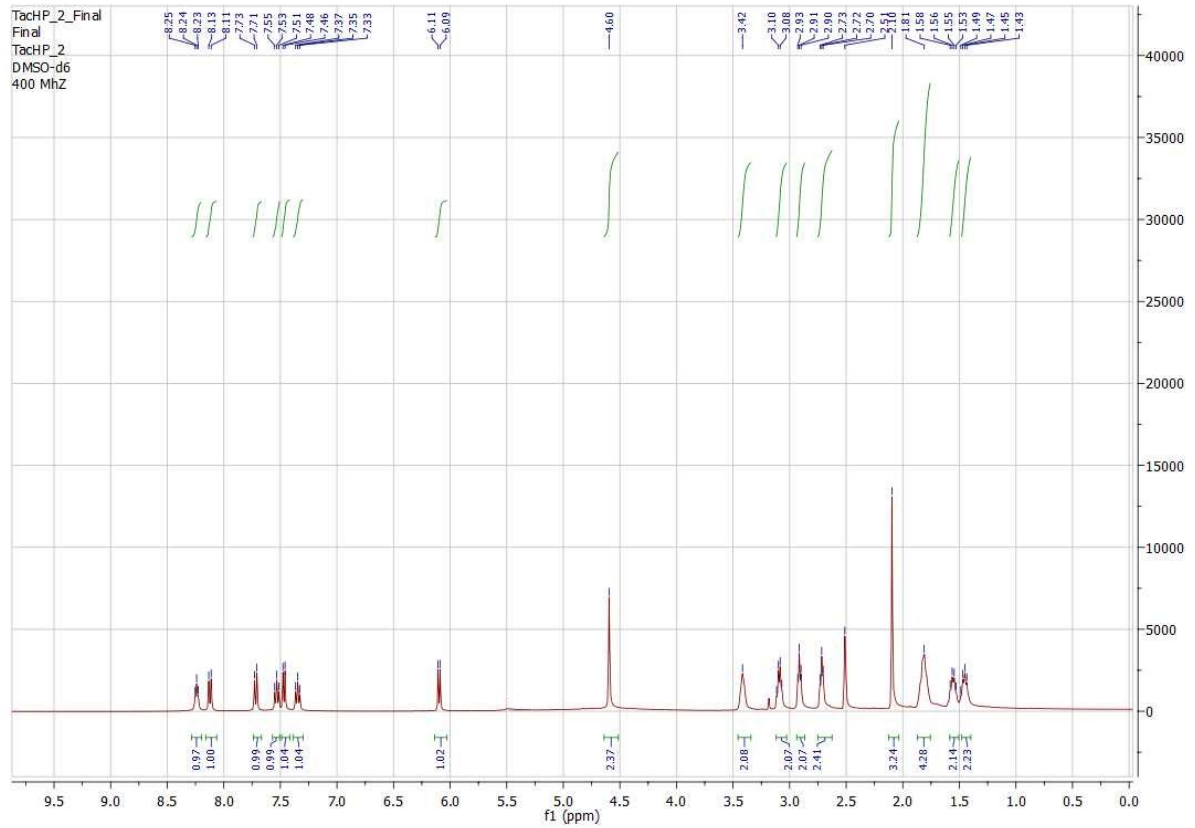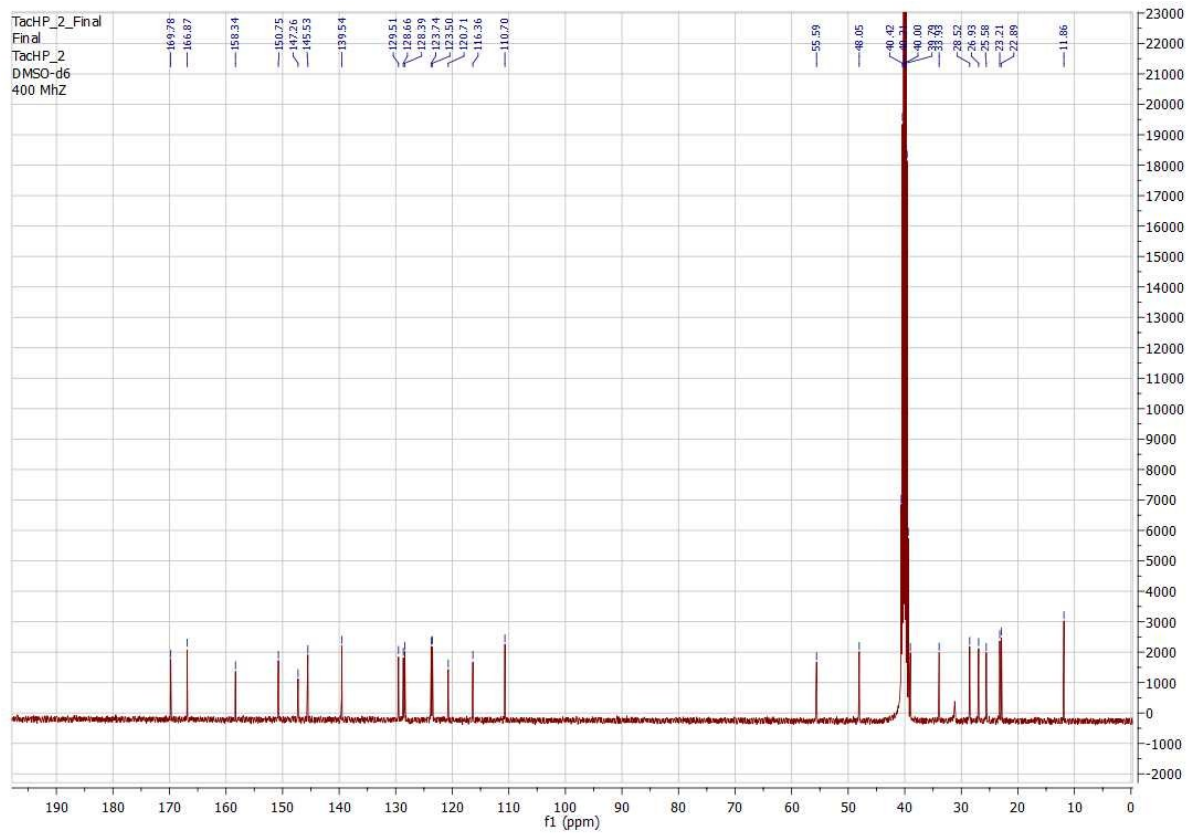

Sp11 -  $^1\text{H}$  &  $^{13}\text{C}$  NMR of 2-(3-hydroxy-2-methyl-4-oxopyridin-1(4H)-yl)-N-(4-((1,2,3,4-tetrahydroacridin-9-yl)amino)butyl)acetamide (**28**).

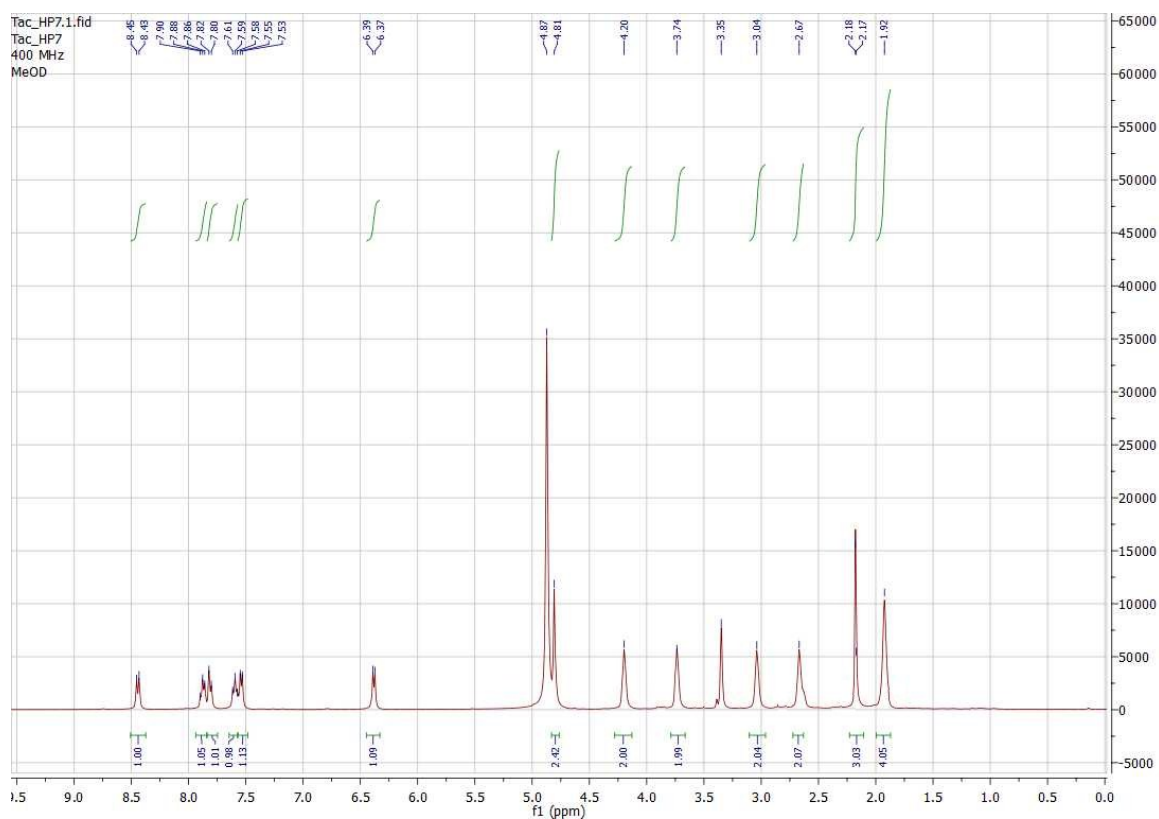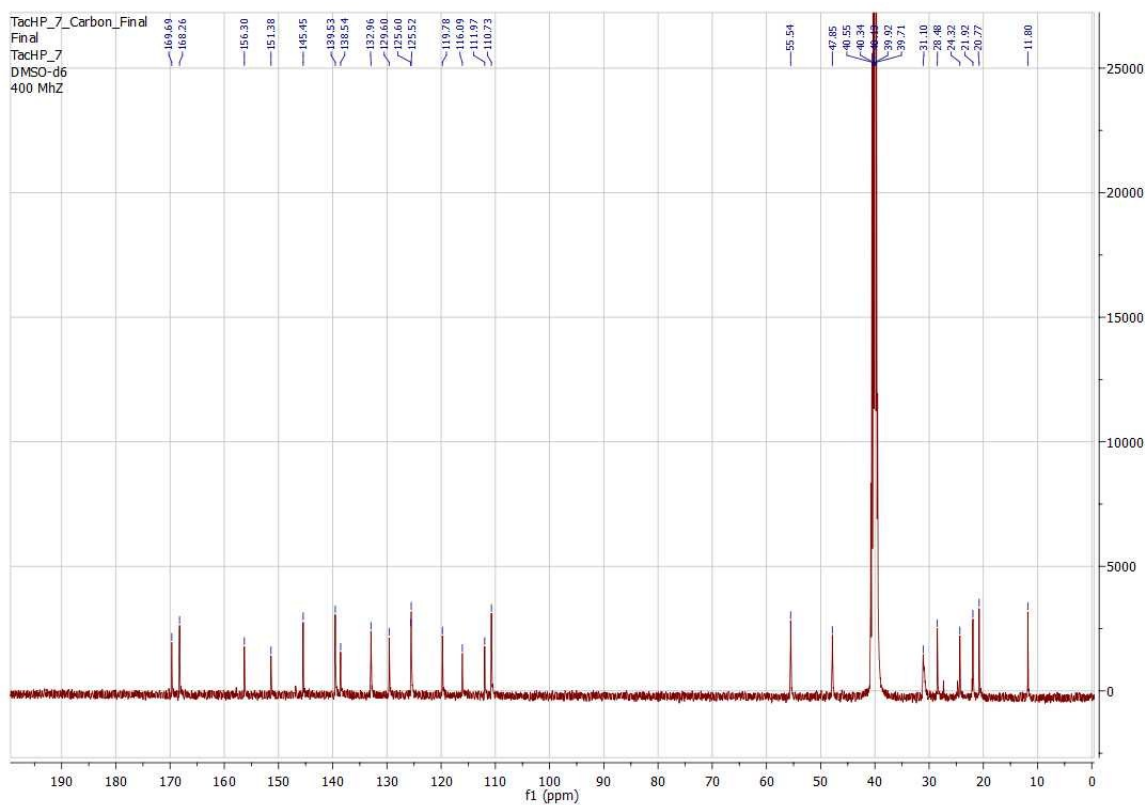



Sp12 -  $^1\text{H}$  &  $^{13}\text{C}$  NMR of *N*-(2-((6-chloro-1,2,3,4-tetrahydroacridin-9-yl)amino)ethyl)-2-(3-hydroxy-2-methyl-4-oxopyridin-1(4H)-yl)acetamide (**29**).

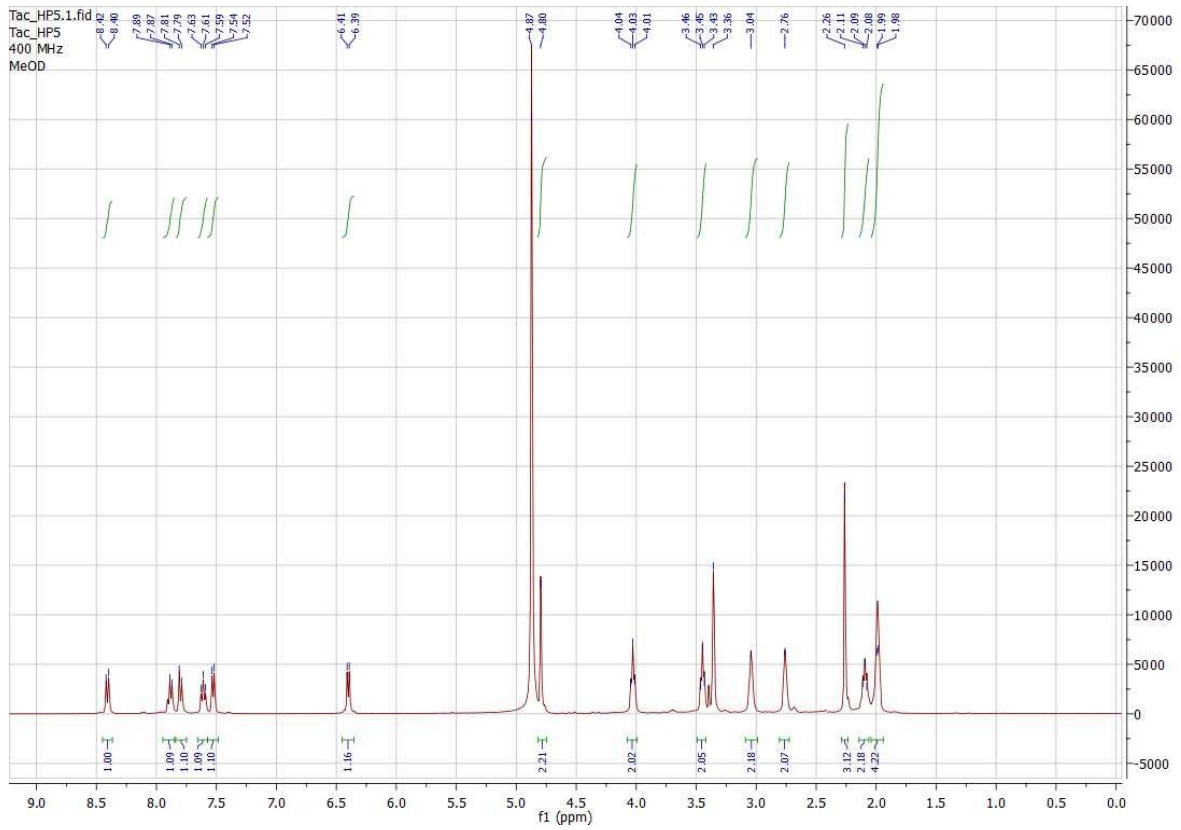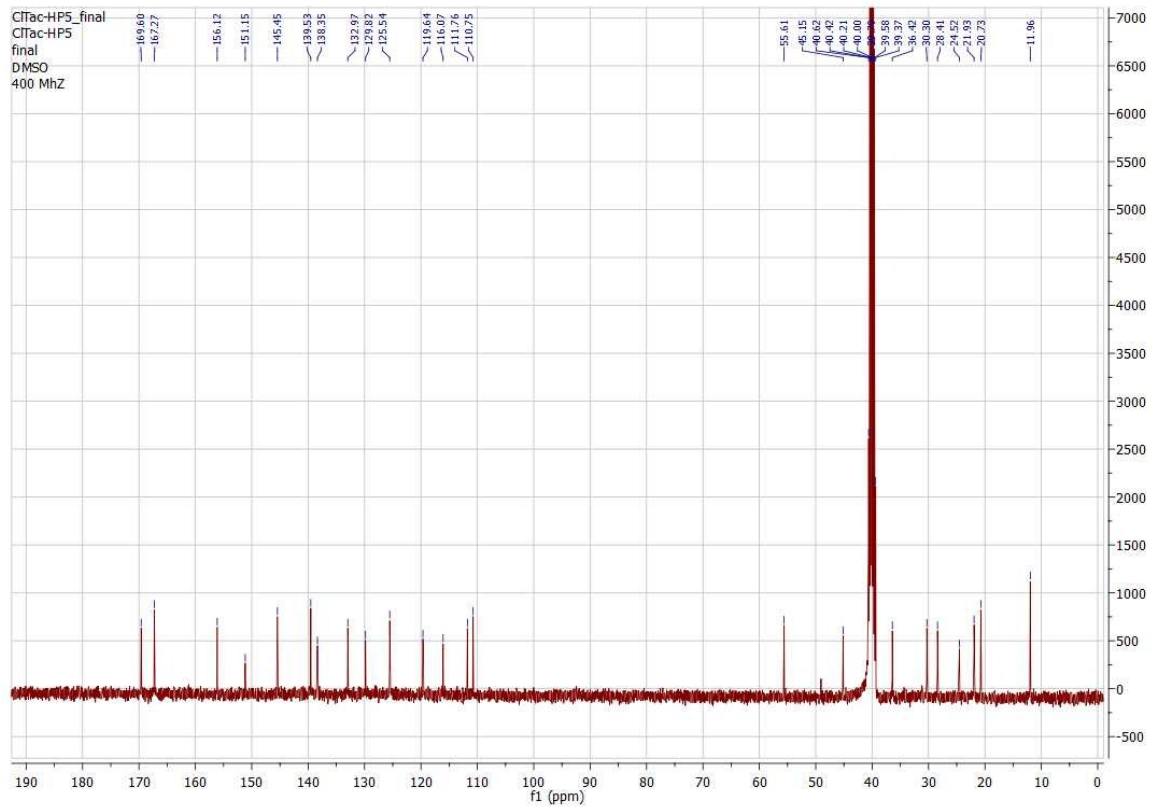

Sp13 -  $^1\text{H}$  &  $^{13}\text{C}$  NMR of *N*-(3-((6-Chloro-1,2,3,4-tetrahydroacridin-9-yl)amino)propyl)-2-(3-hydroxy-2-methyl-4-oxopyridin-1(4*H*)-yl)acetamide (**30**).

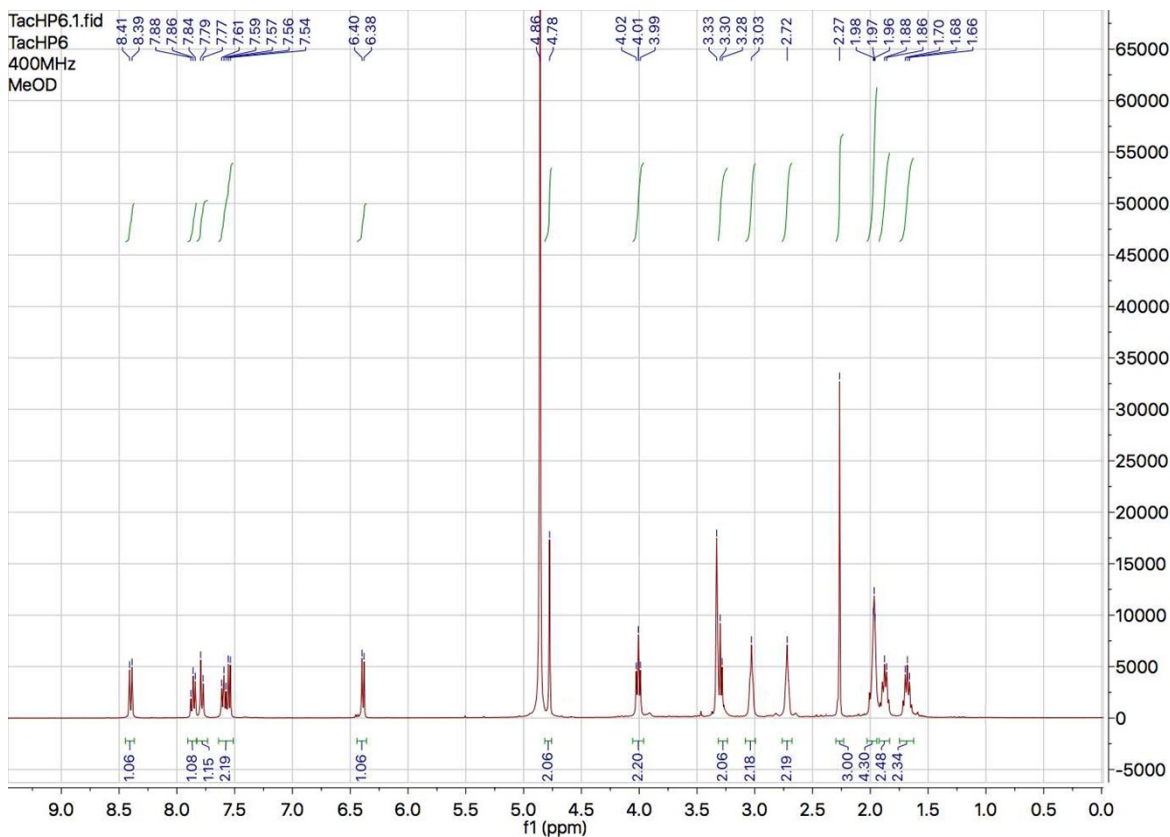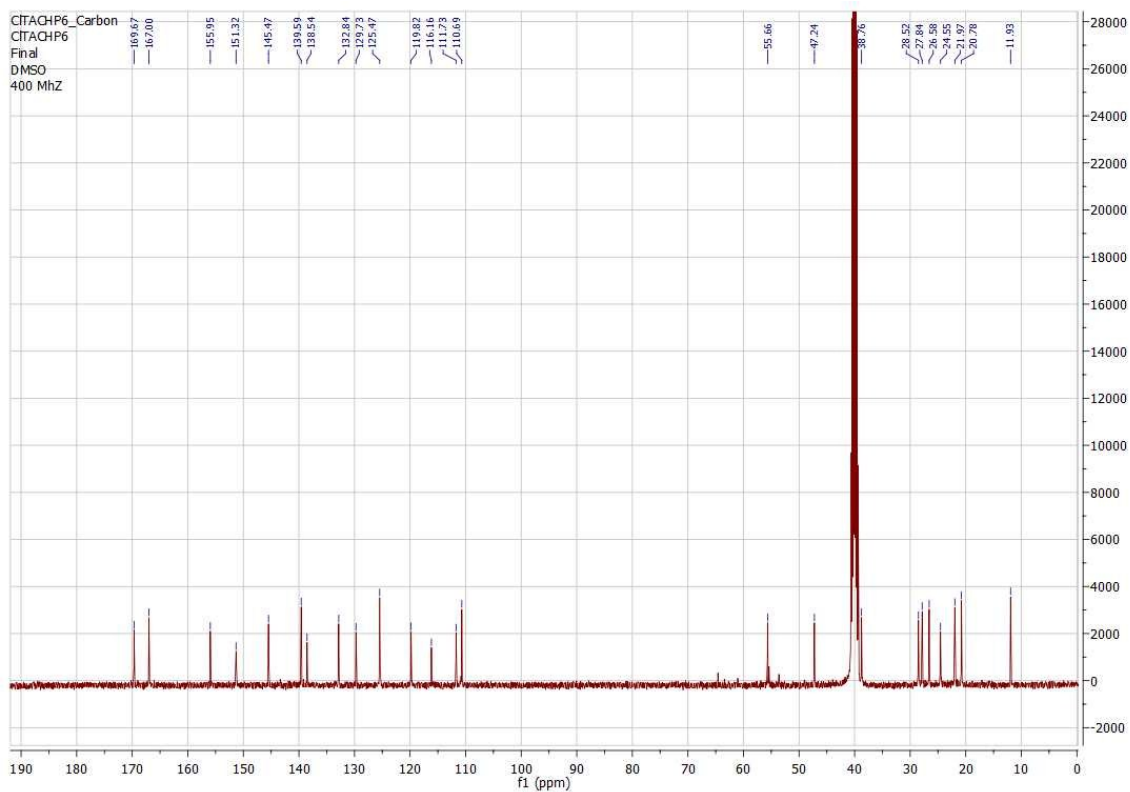

Sp14 -  $^1\text{H}$  &  $^{13}\text{C}$  NMR of *N*-(4-((6-chloro-1,2,3,4-tetrahydroacridin-9-yl)amino)butyl)-2-(3-hydroxy-2-methyl-4-oxopyridin-1(4H)-yl)acetamide (**31**).

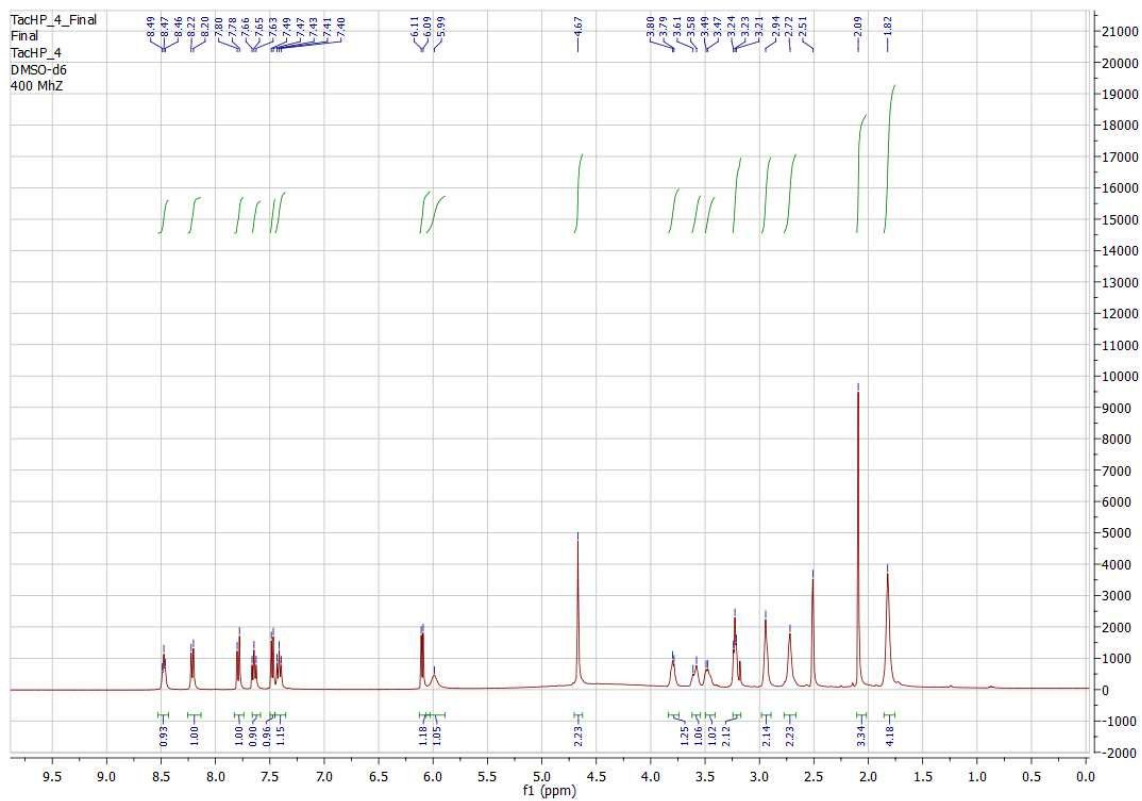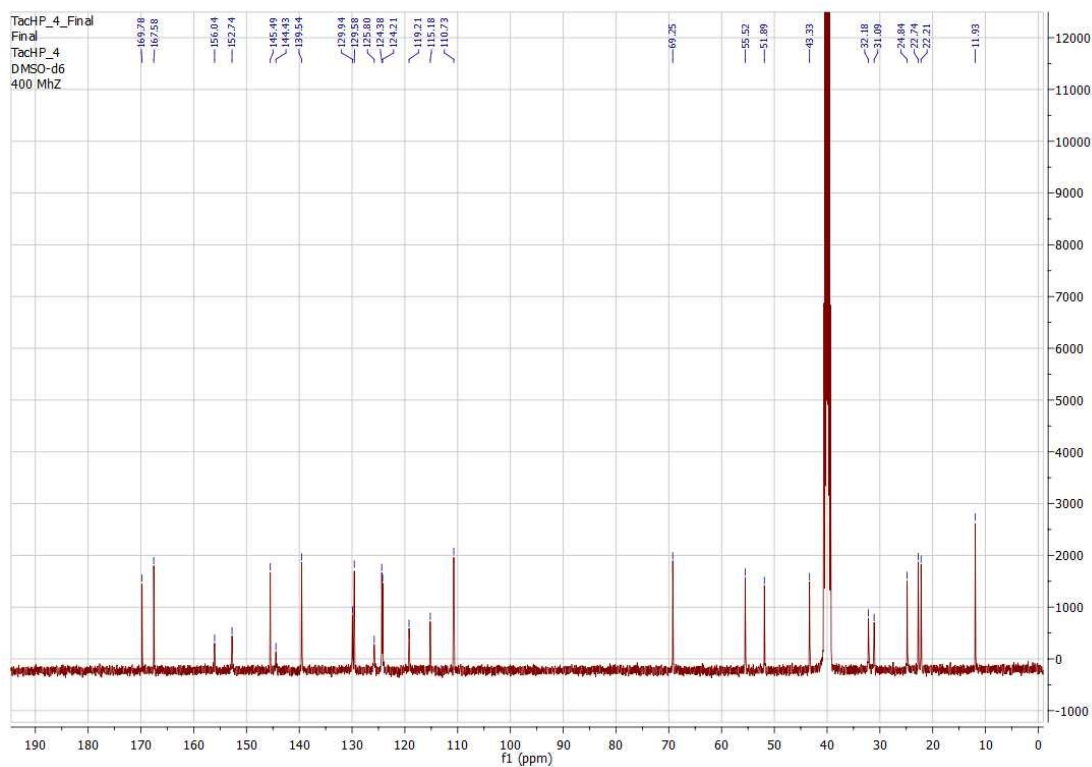

Sp15 -  $^1\text{H}$  &  $^{13}\text{C}$  NMR of 2-(3-hydroxy-2-methyl-4-oxopyridin-1(4H)-yl)-*N*-(2-hydroxy-3-((1,2,3,4-tetrahydroacridin-9-yl)amino)propyl)acetamide (**32**).

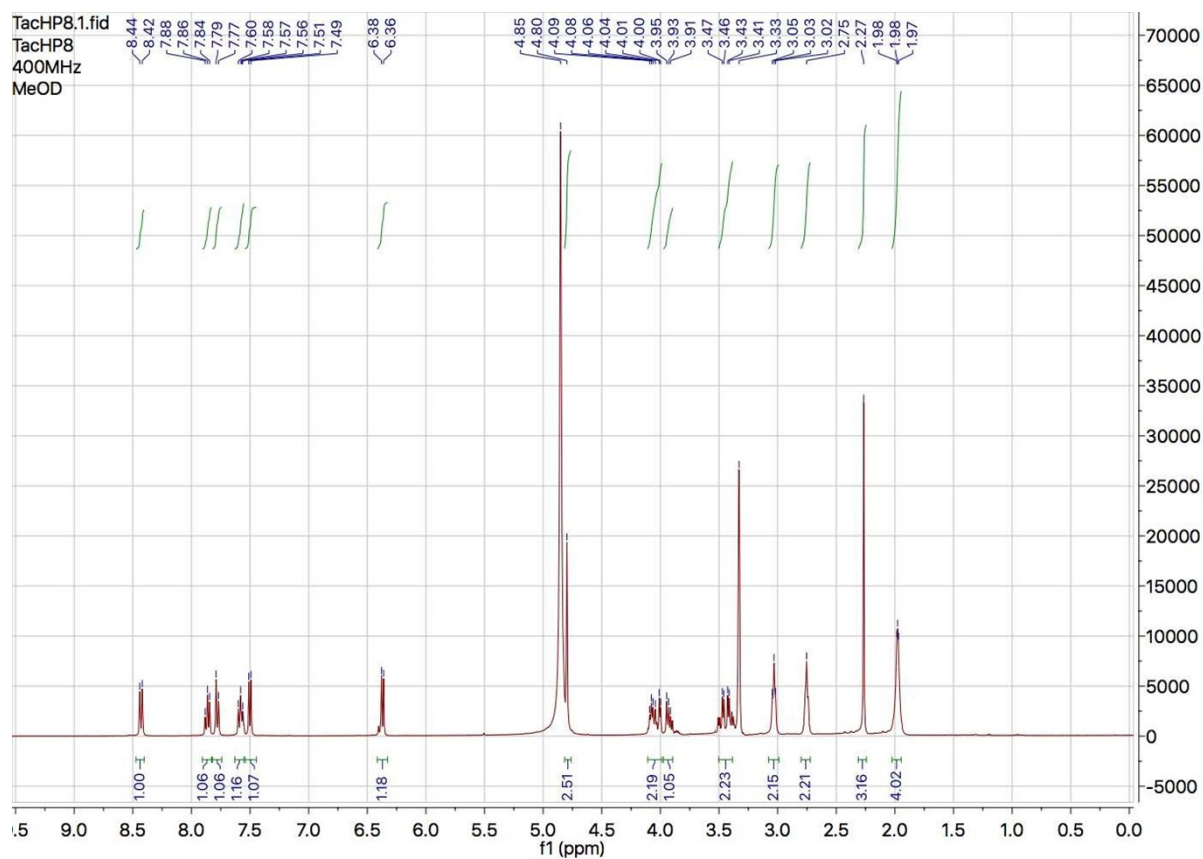

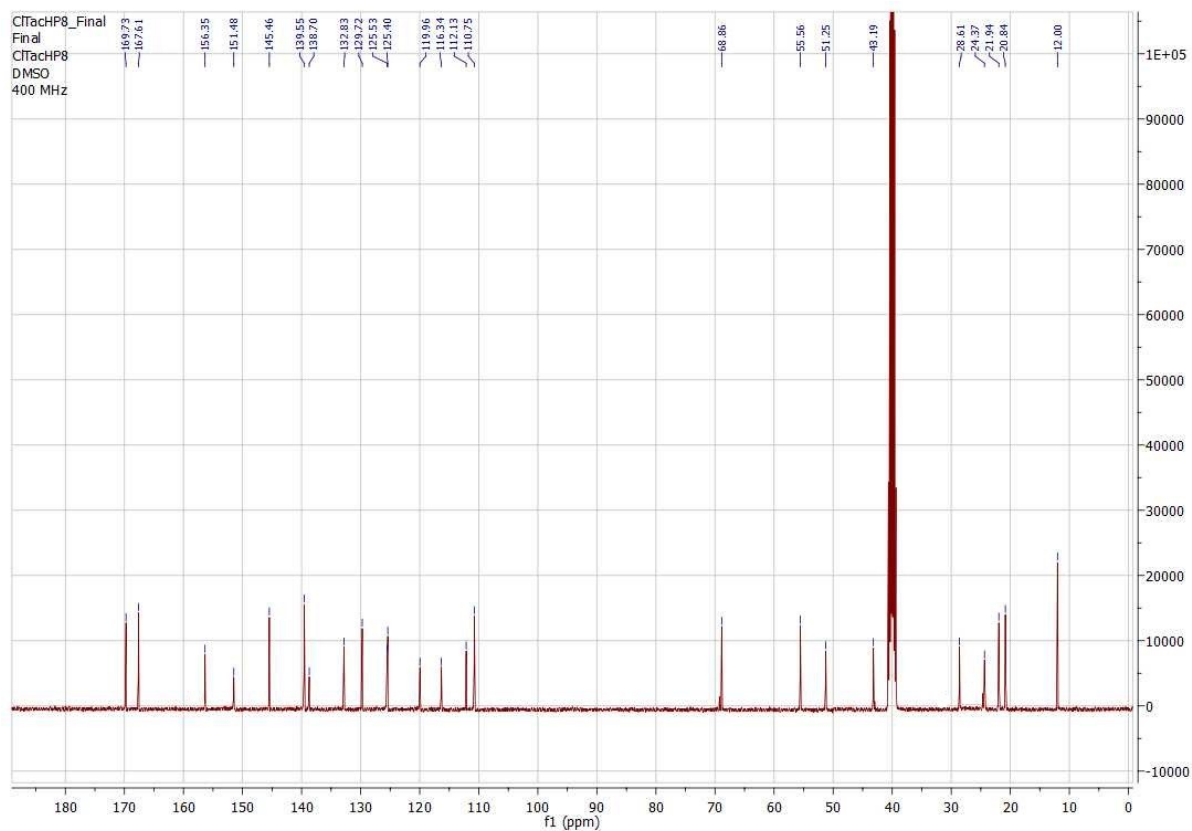

Sp16 -  $^1\text{H}$  &  $^{13}\text{C}$  NMR of *N*-(3-((6-chloro-1,2,3,4-tetrahydroacridin-9-yl)amino)-2-hydroxypropyl)-2-(3-hydroxy-2-methyl-4-oxopyridin-1(4*H*)-yl)acetamide (**33**).
